# Supplementary material for: Template-free solvothermal preparation of ZnO hollow microspheres covered with c planes
Source: Royal Society of Chemistry journal article supplement (doi:10.1039/c4ra02877e), 2014-01-01
Supplement: c4ra02877e1.pdf [file c4ra02877e1.pdf]

## ELECTRONIC SUPPLEMENTARY INFORMATION

### Template-Free Solvothermal Preparation of ZnO Hollow Microspheres Covered with *c* Planes

Taiki Ihara<sup>1)</sup>, Hajime Wagata<sup>2)</sup>, Toshihiro Kogure<sup>3)</sup>, Ken-ichi Katsumata<sup>1)</sup>, Kiyoshi Okada<sup>1)</sup>, and Nobuhiro Matsushita<sup>1)\*</sup>

<sup>1)</sup> Materials and Structures Laboratory, Tokyo Institute of Technology, 4259 Nagatsuta, Midori-ku, Yokohama 226-8503, Japan

<sup>2)</sup> Department of Environmental Science and Technology, Shinshu University, 4-17-1 Wakasato, Nagano 380-8553, Japan

<sup>3)</sup> Department of Earth & Planetary Science, Graduate School of Science, The University of Tokyo, 7-3-1 Hongo, Bunkyo-ku, Tokyo 113-0033, Japan

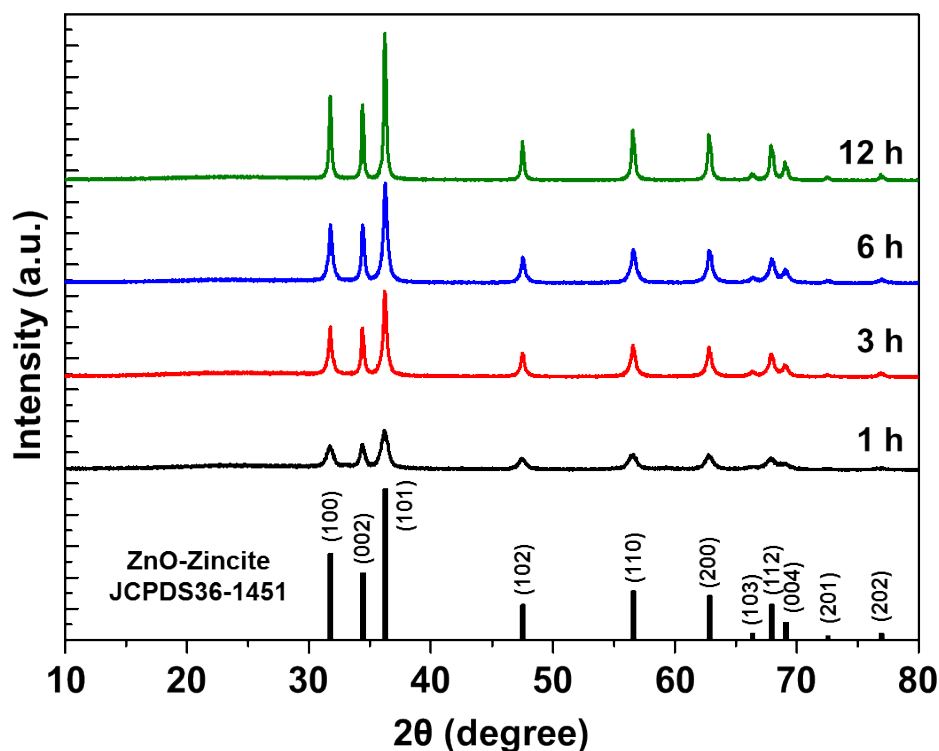

Figure S1. XRD patterns of ZnO particles prepared at 150 °C for different reaction times.

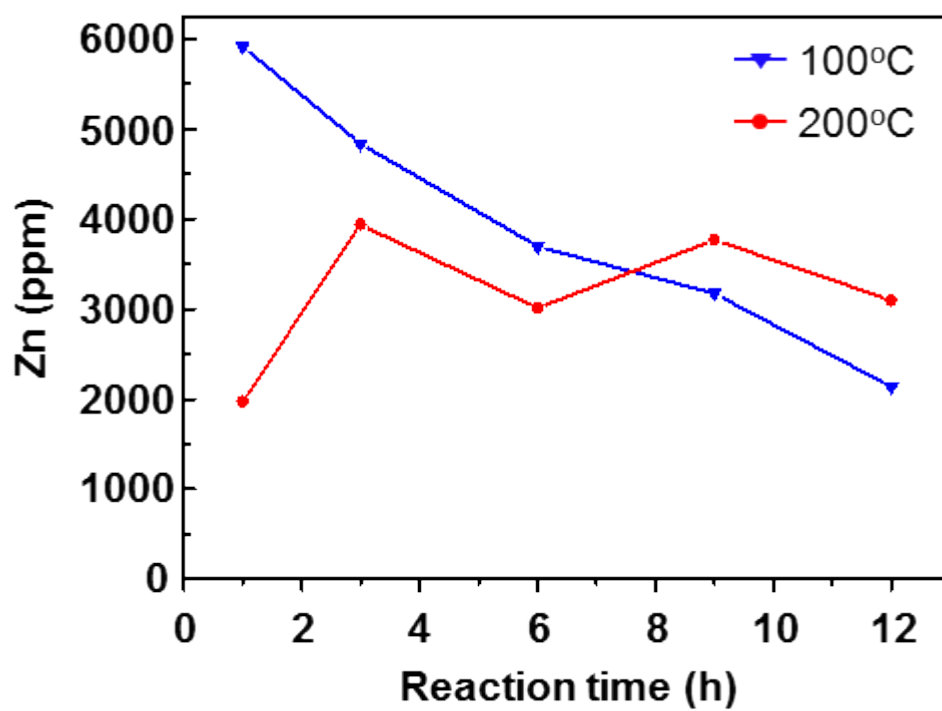

Figure S2. ICP-AES analyses of the variation of supernatant Zn concentration, after reaction at 100 and 200 °C for different reaction times.
